# Supplementary material for: Effect of Sewage Irrigation on the CT-Measured Soil Pore Characteristics of a Clay Farmland in Northern China
Source: MDPI journal article supplement (doi:10.3390/ijerph15051043), 2018-05-22
Supplement: s1 [file s1]

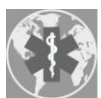

# Supplementary Materials: Effect of Sewage Irrigation on the CT-Measured Soil Pore Characteristics of a Clay Farmland in Northern China

Xiaoming Guo <sup>1</sup>, Tongqian Zhao <sup>1,\*</sup>, Lin Liu <sup>2</sup>, Chunyan Xiao <sup>1</sup> and Yuxiao He <sup>1</sup>

**Table S1.** Characteristics of sewage effluents and groundwater used for irrigation of agricultural soils.

| Irrigation water | pH  | Electrolytic conductivity ( $\mu\text{S cm}^{-1}$ ) | Total Organic carbon ( $\text{mg L}^{-1}$ ) | $\text{Na}^+$ ( $\text{mg L}^{-1}$ ) | $\text{Ca}^{2+}$ ( $\text{mg L}^{-1}$ ) | $\text{Mg}^{2+}$ ( $\text{mg L}^{-1}$ ) | Sodium adsorption ratio | Cr ( $\mu\text{g L}^{-1}$ ) | Cd ( $\mu\text{g L}^{-1}$ ) | Pb ( $\mu\text{g L}^{-1}$ ) |
|------------------|-----|-----------------------------------------------------|---------------------------------------------|--------------------------------------|-----------------------------------------|-----------------------------------------|-------------------------|-----------------------------|-----------------------------|-----------------------------|
| Sewage effluents | 7.7 | 1599                                                | 136.9                                       | 162.5                                | 107.7                                   | 30.6                                    | 3.5                     | 14.9                        | 7.9                         | 25.3                        |
| Groundwater      | 7.2 | 1347                                                | 16.7                                        | 46.2                                 | 139.8                                   | 52.9                                    | 0.8                     | 1.1                         | 1.9                         | 2.0                         |

**Table S2.** Soil physical properties in the S1 irrigated with sewage for 25years, S2 irrigated with sewage for 52 years, and CK irrigated with groundwater.

| Sites | Depth (mm) | Water content (%) | Bulk density ( $\text{g cm}^{-3}$ ) | Sand content (%) | Silt content (%) | Clay content (%) | USDA textural classification |
|-------|------------|-------------------|-------------------------------------|------------------|------------------|------------------|------------------------------|
| S1    | 0-200      | 21.33±0.10        | 1.51±0.02                           | 16.45            | 47.67            | 35.88            | Silty clay loam              |
|       | 200-400    | 18.64±0.36        | 1.68±0.05                           | 17.79            | 39.00            | 43.21            | Clay                         |
| S2    | 0-200      | 21.48±0.56        | 1.61±0.03                           | 26.79            | 32.67            | 40.55            | Clay                         |
|       | 200-400    | 18.29±0.31        | 1.70±0.02                           | 21.45            | 44.00            | 34.55            | Clay loam                    |
| CK    | 0-200      | 22.72±0.82        | 1.57±0.01                           | 23.79            | 41.33            | 34.88            | Clay loam                    |
|       | 200-400    | 20.35±0.12        | 1.61±0.03                           | 22.45            | 43.33            | 34.22            | Clay loam                    |

USDA: United States; Department of Agriculture, values represent means followed by the standard error.

**Table S3.** Soil chemical properties in the S1 irrigated with sewage for 25years, S2 irrigated with sewage for 52 years, and CK irrigated with groundwater.

| Sites | Depth (mm) | pH        | Electrolytic conductivity ( $\mu\text{S cm}^{-1}$ ) | Organic carbon ( $\text{g kg}^{-1}$ ) | Total nitrogen ( $\text{g kg}^{-1}$ ) | Total phosphorus ( $\text{g kg}^{-1}$ ) | Total Chrome ( $\text{mg kg}^{-1}$ ) | Total Lead ( $\text{mg kg}^{-1}$ ) |
|-------|------------|-----------|-----------------------------------------------------|---------------------------------------|---------------------------------------|-----------------------------------------|--------------------------------------|------------------------------------|
| S1    | 0-200      | 8.58±0.10 | 268±9.65                                            | 24.36±1.09                            | 1.42±0.05                             | 0.71±0.05                               | 16.90±7.84                           | 12.14±4.56                         |
|       | 200-400    | 8.56±0.06 | 273±7.68                                            | 11.14±0.48                            | 0.71±0.03                             | 0.56±0.01                               | 8.64±5.67                            | 8.96±0.89                          |
| S2    | 0-200      | 8.37±0.26 | 286±12.34                                           | 24.58±0.75                            | 1.45±0.04                             | 0.82±0.07                               | 32.27±13.99                          | 16.43±6.85                         |

|    |         |           |           |            |           |           |            |           |
|----|---------|-----------|-----------|------------|-----------|-----------|------------|-----------|
|    | 200-400 | 0.62±0.40 | 293±10.02 | 11.60±0.37 | 0.58±0.10 | 0.49±0.03 | 22.19±2.89 | 8.39±1.25 |
|    | 0-200   | 8.64±0.42 | 173±14.56 | 19.10±2.20 | 1.01±0.06 | 0.68±0.03 | 6.38±3.92  | 6.94±0.58 |
| CK | 200-400 | 0.62±0.06 | 206±19.06 | 8.99±0.32  | 0.61±0.04 | 0.51±0.06 | 7.13±1.57  | 6.77±3.67 |

Values represent means followed by the standard error.

**Table S4.** Soil microbial properties in the S1 irrigated with sewage for 25years, S2 irrigated with sewage for 52 years, and CK irrigated with groundwater.

| Sites | Depth (mm) | Bacteria number (10 <sup>6</sup> cfu g <sup>-1</sup> ) | Fungi number (10 <sup>4</sup> cfu g <sup>-1</sup> ) | Actinomycete number (10 <sup>6</sup> cfu g <sup>-1</sup> ) |
|-------|------------|--------------------------------------------------------|-----------------------------------------------------|------------------------------------------------------------|
| S1    | 0-200      | 10.60±5.15                                             | 1.08±0.27                                           | 9.01±1.74                                                  |
|       | 200-400    | 4.09±2.56                                              | 0.25±0.00                                           | 2.25±0.39                                                  |
| S2    | 0-200      | 16.55±1.16                                             | 1.06±0.27                                           | 13.69±3.50                                                 |
|       | 200-400    | 7.33±0.01                                              | 0.32±0.19                                           | 3.75±0.24                                                  |
| CK    | 0-200      | 8.51±1.20                                              | 1.17±0.22                                           | 5.05±0.71                                                  |
|       | 200-400    | 4.25±0.00                                              | 0.36±0.27                                           | 1.09±0.19                                                  |

Values represent means followed by the standard error.

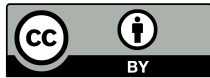

© 2017 by the authors. Licensee MDPI, Basel, Switzerland. This article is an open access article distributed under the terms and conditions of the Creative Commons Attribution (CC BY) license (<http://creativecommons.org/licenses/by/4.0/>).
